# Supplementary material for: Colonization with the enteric protozoa Blastocystis is associated with increased diversity of human gut bacterial microbiota
Source: PubMed Central journal article supplement (PMC4857090; doi:10.1038/srep25255), 2016-05-05
Supplement: srep25255-s1.pdf [file srep25255-s1.pdf]

**Colonization with the enteric protozoa *Blastocystis* is associated with increased diversity  
of human gut bacterial microbiota**

Christophe Audebert<sup>1,2,+</sup>, Gaël Even<sup>1,2,+</sup>, Amandine Cian<sup>3</sup>, The *Blastocystis* Investigation Group<sup>‡</sup>, Alexandre Loywick<sup>1,2</sup>, Sophie Merlin<sup>1,2</sup>, Eric Viscogliosi<sup>3</sup>, and Magali Chabé<sup>3,\*</sup>

<sup>1</sup>GENES DIFFUSION, Douai, France

<sup>2</sup>PEGASE-Biosciences, Institut Pasteur de Lille, Lille, France

<sup>3</sup>Univ. Lille, CNRS, Inserm, CHU de Lille, Institut Pasteur de Lille, U1019 - UMR 8204 - CIIL  
- Center for Infection and Immunity of Lille, Lille, France

\*corresponding author: magali.chabe@univ-lille2.fr

+These authors contributed equally to this work.

‡See the list of The *Blastocystis* Investigation Group members at the end of the manuscript.

**Supplementary information:**

**Supplementary Figure S1:** Faecal bacterial communities present in the different samples (DNA samples from patients' groups 1, 2, 3 and 4) analyzed in this study. Plots of relative abundances of OTUs at four taxonomic levels: phylum (a), class (b), order (c) and family (d). The most abundant and interesting taxa are labeled with arrows.

**Supplementary Table S1:** Reads metrics from output sequence data (PGM quality-approved, trimmed and filtered data) and mean number of preprocessed reads per index after the high-quality filtering approach. \* Three outlier samples (indexes 18, 63 and 50 belonging to groups 1, 2 and 3 respectively), were discarded before the subsequent bioinformatics analyses.

**Supplementary Figure S1.** Faecal bacterial communities present in the different samples (DNA samples from patients' groups 1, 2, 3 and 4) analyzed in this study. Plots of relative abundances of OTUs at four taxonomic levels: phylum (a), class (b), order (c) and family (d). The most abundant and interesting taxa are labeled with arrows.

a)

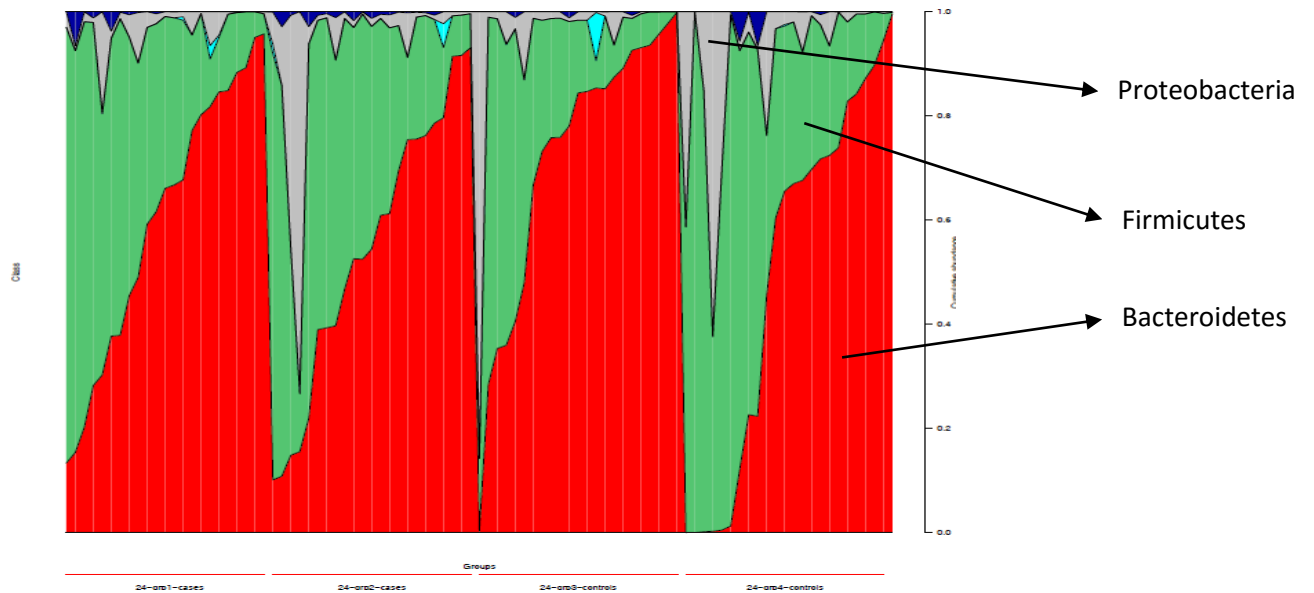

b)

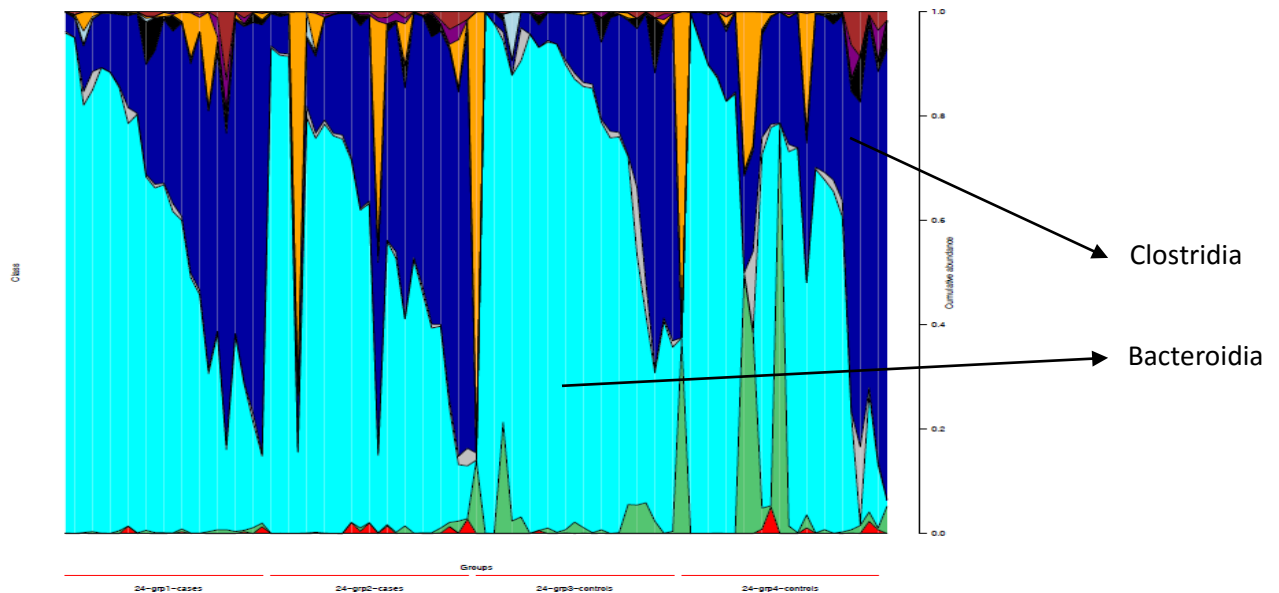

c)

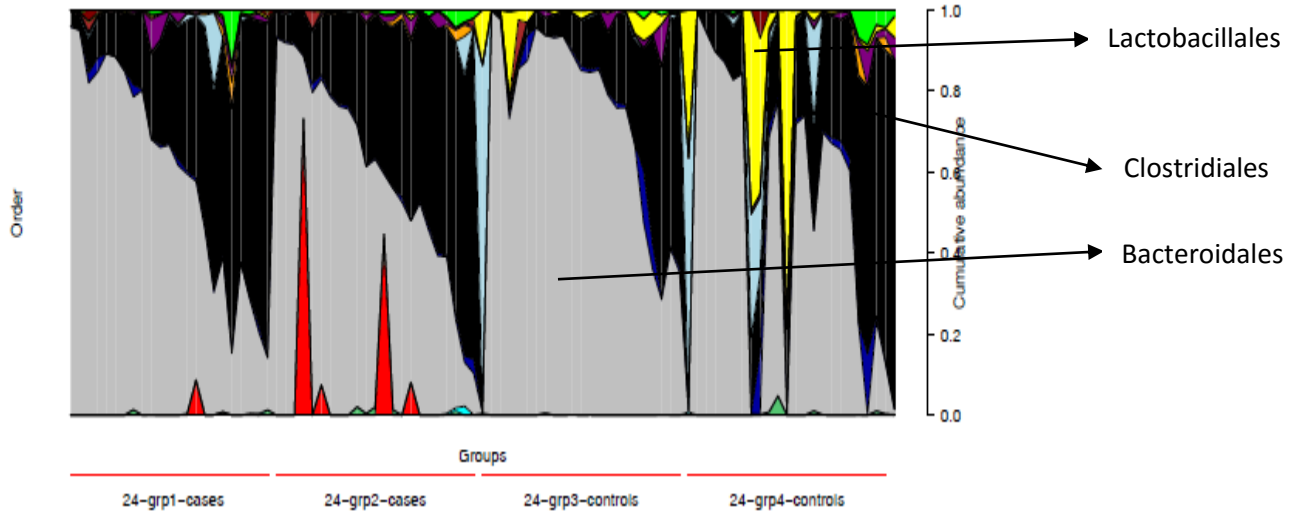

d)

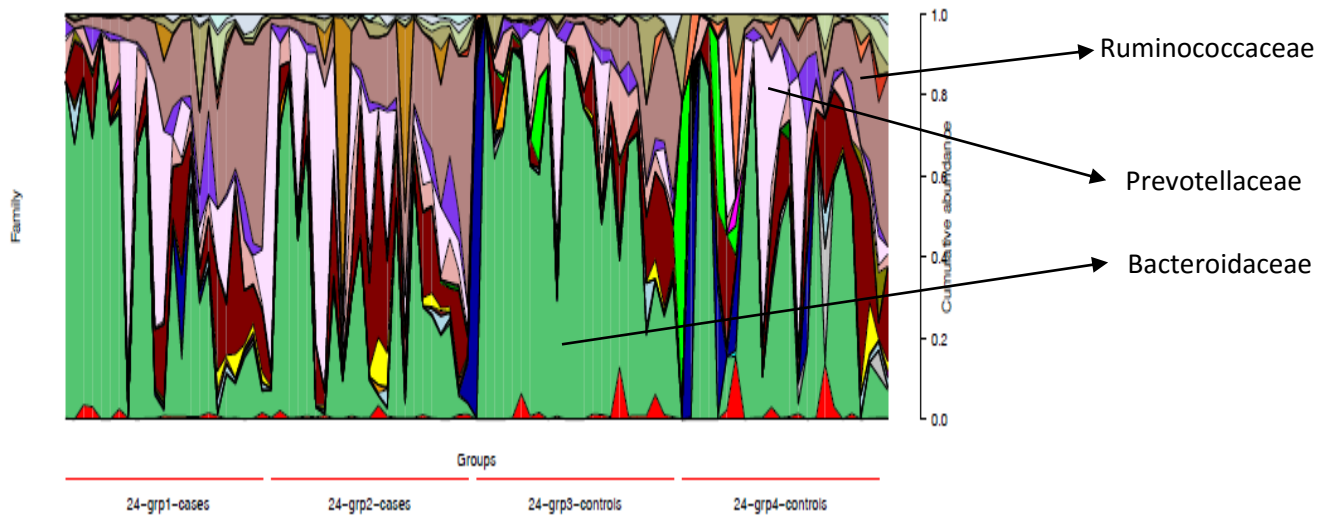

**Supplementary Table S1.** Reads metrics from output sequence data (PGM quality-approved, trimmed and filtered data) and mean number of preprocessed reads per index after the high-quality filtering approach. \* Three outlier samples (indexes 18, 63 and 50 belonging to groups 1, 2 and 3 respectively), were discarded before the subsequent bioinformatics analyses.

|                                                     | Mean read length (bases) | Median read length (bases) | Minimum read number/index | Mean read number/index | Median read number / index | Mean preprocessed reads number/index |
|-----------------------------------------------------|--------------------------|----------------------------|---------------------------|------------------------|----------------------------|--------------------------------------|
| All reads <sup>a</sup>                              | 272.67                   | 273                        | 14,617                    | 42,603.26              | 41,956.00                  | 29,485.03                            |
| Reads from <i>Blastocystis</i> - colonized patients | 271.98                   | 274                        | 14,617                    | 43,604.02              | 44,533.50                  | 30,541.19                            |
| Reads from <i>Blastocystis</i> -free individuals    | 273.34                   | 272                        | 21 039                    | 41,623.79              | 41,057.00                  | 28,451.34                            |
